# Supplementary material
Source: Elsevier journal article supplement (https://www.sciencedirect.com/science/article/pii/S1579212914003759)
Supplement: mmc1 [file S1579212914003759:mmc1.pdf]

## **NORMATIVA PARA EL DIAGNOSTICO Y SEGUIMIENTO DE LA SILICOSIS**

### **AUTORES:**

**Ramón Fernández Álvarez** : Area de Gestion de Pulmon. Servicio de Neumología del Hospital Universitario Central de Asturias

**Cristina Martínez González** Area de Gestion de Pulmon. Servicio de Neumología del Hospital Universitario Central de Asturias

**Aida Quero Martínez**: Area de Gestion de Pulmon. Servicio de Neumología del Hospital Universitario Central de Asturias

**José Jesús Blanco Pérez**. Servicio de Neumología

**Luis Carazo Fernández** Servicio de Neumología

**Amador Prieto Fernández** Servicio de Radiología del Hospital Universitario Central de Asturias

### **Palabras Clave**

Silicosis

Neumoconiosis

Enfermedad profesional

**Autor para correspondencia: Ramón Fernández Álvarez**

**[enellano@gmail.com](mailto:enellano@gmail.com)**

## RESUMEN

La silicosis es una de las enfermedades respiratorias de origen ocupacional más frecuentes en nuestro entorno, la cual está ocasionada por inhalación de sílice cristalina que desencadena una respuesta fibrótica en el parénquima pulmonar. Se presenta como una enfermedad intersticial difusa y su expresión clínica es variable existiendo desde formas asintomáticas hasta la insuficiencia respiratoria crónica. El diagnóstico está basado en la historia clínica y los hallazgos radiológicos; no tiene un tratamiento efectivo y cuando se diagnostica precisa que el paciente sea apartado de toda fuente de exposición laboral. Esta normativa repasa aspectos clínicos, radiológicos y funcionales, sugiriendo también estrategias de diagnóstico y seguimiento para la clasificación de los pacientes, y recomendaciones para las implicaciones laborales de esta enfermedad.

## INTRODUCCION

La silicosis es una enfermedad intersticial difusa producida por inhalación mantenida de sílice cristalina ( $\text{SiO}_2$ ). Se caracteriza por una respuesta fibrótica del parénquima pulmonar y forma parte de las neumoconiosis o enfermedades pulmonares causadas por inhalación de polvo mineral. No tiene un tratamiento efectivo. Su presentación y curso clínico es variable, con diferentes niveles de gravedad, por ello, la prevención y el diagnóstico precoz son dos aspectos fundamentales en su control. A pesar de ser una enfermedad conocida desde antiguo y de las mejoras alcanzadas en su prevención, continúa siendo un problema de salud pública mundial y una de las

enfermedades respiratorias de origen ocupacional más frecuentes en nuestro entorno. Su tipificación como enfermedad profesional, añade la necesidad de realizar una valoración orientada a la capacidad laboral en cada paciente. Esta normativa va dirigida a todos los profesionales de la Neumología y médicos que atiendan a pacientes con potencial exposición a sílice, y tiene como objetivo revisar los aspectos fundamentales de esta enfermedad y unificar la metodología diagnóstica y las medidas terapéuticas y preventivas a tomar.

## EPIDEMIOLOGIA

No existen cifras fiables sobre población expuesta a inhalación de sílice, por ello no se conoce la prevalencia real de esta enfermedad, sin embargo algunos datos permiten hacer estimaciones sobre su relevancia epidemiológica. La base de datos CAREX, en el año 2000 cifraba en 3,2 millones de personas expuestas a sílice en la Unión Europea y en España en 2004 había 1,2 millones de trabajadores expuestos especialmente en el sector de la construcción **(1)**.

En nuestro país se han desarrollado estudios transversales en industrias con riesgo de inhalación de sílice, obteniéndose prevalencias variables: 47,5% en canteras de granito de El Escorial (1990) **(2)**, 6% en minería subterránea de espato-flúor de Asturias (1993) **(3)**, 6% en la industria de la pizarra en Galicia (1994) **(4)**, y 6% en explotaciones de granito en Extremadura **(5)**. En las memorias anuales del Instituto Nacional de Silicosis (INS) aunque no se dispone de información de todas las comunidades autónomas, se observa que la enfermedad está presente en la mayoría de ellas **(6)** (Figura 1), y podemos

apreciar como a partir de 2008 hay un aumento del número de nuevos diagnósticos en trabajadores en activo y procedentes de industrias distintas a la minería del carbón (granito, pizarras, conglomerados artificiales de sílice). Estas variaciones observadas a lo largo de la última década pueden ser reflejo de modificaciones reales de la incidencia de la enfermedad, o también factores derivados de circunstancias socioeconómicas (tabla1). Por tanto aunque no conozcamos la situación epidemiológica real, puede afirmarse que la silicosis sigue siendo una enfermedad con gran presencia entre las patologías derivadas de la exposición laboral.

## **ETIOLOGIA Y FACTORES DE RIESGO**

### **Etiología**

La causa de la silicosis es la inhalación de sílice cristalina, cuyas variedades incluyen el cuarzo (la más abundante en la naturaleza), la cristobalita y la tridimita.

Las fuentes de exposición se producen de forma casi exclusiva en el ámbito laboral (tabla 2) y son muy numerosas, ya que la sílice se encuentra en proporciones variables en muchos minerales.

En principio cualquier proceso que implique movimiento de tierra o de productos que contengan sílice como en albañilería-manpostería y/o hormigón puede exponer a los trabajadores a sílice. En nuestro medio existe alta prevalencia en los trabajadores de canteras e industria de roca ornamental (granito y pizarra) y en los últimos años se han descrito casos de silicosis en trabajadores de marmolerías expuestos al polvo generado por la manipulación de aglomerados de cuarzo, muy utilizados en decoración de interiores, cocinas

y sanitarios, con un contenido en sílice cristalina entre el 70 y el 90% **(7)**. Exposiciones ambientales a sílice cristalina respirable pueden estar significativamente elevadas en proximidades de fuentes industriales como canteras y areneras y se han descrito casos de silicosis de origen no ocupacional en comunidades residentes próximas a dichos lugares **(8)**.

### **Factores de riesgo para el desarrollo de silicosis**

#### *1) Intensidad de exposición*

El riesgo para la aparición de silicosis guarda estrecha relación con la magnitud de la exposición acumulada a polvo de sílice cristalina a lo largo de la vida laboral. Dicha exposición se calcula con el producto:

*Dosis acumulada de sílice= fracción de polvo respirable x porcentaje de sílice libre en mg/m<sup>3</sup> x número de años de exposición.*

ejemplos:

*1)- Trabajador con 40 años de exposición a una fracción de polvo respirable de 1,69 mg/mm<sup>3</sup> y sílice libre de 0,21*

*Dosis acumulada = 1,69mg/mm<sup>3</sup> x 0,21 mg/mm<sup>3</sup>SiO<sub>2</sub> x 40 años= 14,19*

*2)- Trabajador con 20 años de exposición a una fracción de polvo respirable de 1,69 mg/mm<sup>3</sup> y sílice libre de 0,42*

*Dosis acumulada = 1,69mg/mm<sup>3</sup> x 0,42 mg/mm<sup>3</sup> SiO<sub>2</sub> x 20 años= 14,19*

En relación con la exposición es preciso tener en cuenta los siguientes conceptos

.- **Fracción de polvo respirable**: polvo que por el tamaño de sus partículas es capaz de alcanzar las unidades alveolares (30% de las partículas de 5 micras y el 100% de las de 1 micra). Las partículas mayores de 10 micras quedan depositadas en las vías aéreas superiores por impactación.

.- **Valor límite ambiental (VLA)**: son valores de referencia considerados seguros. Si estos valores no fuesen superados, una gran mayoría de trabajadores expuestos durante toda su vida laboral no sufrirían efectos adversos para su salud **(9)**. La legislación sobre los límites de polvo respirable varían de unos países a otros y en España están regulados por la orden ITC/2585/2007 del 30 de agosto de 2007, por la que se aprueba la instrucción técnica complementaria 2.0.02 sobre “Protección de los trabajadores contra el polvo, en relación con la silicosis en las industrias extractivas” **(10)**:

a) La concentración de sílice libre contenida en la fracción respirable de polvo no será superior a 0,1 mg/m<sup>3</sup> (Si se tratase de cristobalita o tridimita este valor se reducirá a 0,05 mg/m<sup>3</sup>).

b) La concentración de la fracción respirable de polvo no sobrepasará el valor de 3 mg/m<sup>3</sup>.

Sin embargo distintos estudios han detectado que el umbral de 0,05mg/m<sup>3</sup> no protege suficientemente del riesgo de contraer silicosis **(11)**, y tampoco hay un umbral que podamos considerar seguro y sin riesgo, por ello toda reducción en la exposición reducirá el riesgo de enfermedad.

Además, las características propias del trabajo desempeñado influyen en la intensidad de la exposición. El polvo con concentraciones elevadas de sílice seca y recién fracturada es el más nocivo, esto ocurre en los limpiadores con chorro de arena, que se fractura en partículas finas y su inhalación puede producir formas agudas y aceleradas de silicosis(12).

## *2) Factores individuales:*

Hay que tener en cuenta que la exposición aunque importante, no es totalmente determinante, ya que es frecuente observar trabajadores en los que la relación dosis-respuesta no se cumple. Hay casos de especial susceptibilidad a dosis bajas y otros de elevada tolerancia a grandes exposiciones (13). La susceptibilidad individual se relaciona con el depósito y persistencia del polvo inhalado en el organismo, por pérdida de la eficacia de los mecanismos de defensa y aclaramiento, ello puede estar influido bien por factores genéticos o por otros factores: tabaquismo y/ o presencia de enfermedades respiratorias como la EPOC. Dentro de los factores de riesgo para progresión de la enfermedad se han identificado: los altos niveles de exposición, la historia previa de tuberculosis y la profusión de opacidades radiológicas en los estudios de imagen.

## **FORMAS CLINICAS**

Según los datos clínicos, radiológicos y funcionales podemos diferenciar unas formas de presentación de la enfermedad que clasificamos en: silicosis crónica (simple, complicada y fibrosis pulmonar intersticial), silicosis acelerada y silicosis aguda (tabla 3).

## **Silicosis crónica**

Las formas simples y complicadas son las más habituales. En general aparecen tras 10-15 años exposición. La sintomatología es muy variable desde la *silicosis crónica simple* que es asintomática y se detecta en una exploración radiológica hasta la *silicosis complicada* cuyos síntomas más frecuentes son la disnea y la tos. La manifestación radiológica clásica de la silicosis simple es un patrón nodular difuso y bilateral (opacidades menores de 1 cm), con mayor afectación de los lóbulos superiores y de las zonas posteriores del pulmón. Desde la forma simple puede haber una progresión a silicosis complicada (definida por la presencia de opacidades con diámetro mayor de 1 cm) en un proceso de conglomeración de nódulos, retracción del parénquima y enfisema cicatricial. En los casos más graves aparece una gran desestructuración con formación de masas de fibrosis, e insuficiencia respiratoria y cor pulmonale crónico. Este proceso de progresión desde la silicosis simple a complicada es consecuencia de una compleja interacción entre la intensidad y la duración de la exposición y susceptibilidad genética del sujeto **(14)**.

En la *fibrosis pulmonar intersticial*, el síntoma principal es la disnea, y su presentación radiológica es muy similar a la fibrosis pulmonar idiopática (FPI). Es una forma de presentación poco estudiada, aunque una publicación reciente la encontraba presente en un 11% de casos de neumoconiosis que presentaban estudios radiológicos con TC interpretados como FPI **(15)**.

## **Silicosis acelerada**



Es una entidad intermedia entre la forma aguda y las crónicas, que suele aparecer tras un periodo de 5-10 años de exposición y progresa hacia formas complicadas con mayor frecuencia y velocidad. **(16,17)**

### **Silicosis aguda o Silicoproteinosis**

Suele estar inducida por exposiciones masivas. Se parece a la proteinosis alveolar, con disnea, pérdida de peso y progresión hacia insuficiencia respiratoria **(18)** . En las radiografías de tórax se observan consolidaciones perihiliares bilaterales similares a la proteinosis alveolar y en la TCAR un patrón difuso en “vidrio deslustrado” o consolidaciones del espacio aéreo.

### **DIAGNOSTICO:**

El diagnostico de Silicosis se sustenta en la concurrencia de los siguientes criterios:

- 1.- Historia laboral de exposición a sílice cristalina
- 2.- Estudios radiológicos con hallazgos característicos: radiografía de tórax simple con profusiones  $> \text{o} = \text{a } 1/1$  (ver clasificación ILO)
- 3.- Exclusión de otras entidades posibles.

### **1.-Historia laboral**

La historia laboral es imprescindible para estimar la exposición acumulada a polvo de sílice y debe de incluir la siguiente información **(18)**, en ocasiones las rotaciones en los puestos de trabajo pueden dificultar la realización de una adecuada historia laboral, que debería de incluir:

.- Actividad laboral actual y previa reflejando el tiempo de exposición a sílice cristalina.

.-Descripción detallada del puesto de trabajo.

.-Medidas de protección técnica (corte con agua, ventilación, aspiración de polvo) e individuales (máscaras).

.-Medición del polvo respirable, con el fin de conocer el riesgo acumulado al que han estado expuestos (en las ocasiones que se encuentre disponible dicha información).

## **2.-Estudios Radiológicos**

### **Radiografía simple de tórax**

Es una exploración imprescindible para el diagnóstico de silicosis y para la valoración de su posible progresión. La Organización Internacional del Trabajo (Internacional Labour Office –ILO-) ha establecido una clasificación que codifica las alteraciones radiológicas de forma reproducible **(19)**.

#### ***Lectura ILO***

Se divide en cinco apartados:

1. Calidad técnica de la radiografía: 1: buena, 2:aceptable, 3:baja calidad y 4:inaceptable.
2. Alteraciones parenquimatosas: atendiendo a tamaño, profusión, forma y localización (figuras 2 y 3)

2.1 Pequeñas opacidades: Se describen según su profusión, campos pulmonares afectados, forma y tamaño.

2.1.1 Profusión: Indica el número de opacidades en un área del pulmón en comparación con una radiografía normal. Existen 12 categorías que se agrupan en 4 en función del grado de borramiento de las estructuras vasculares del pulmón que condicionan.

Categoría 0: ausencia de opacidades pequeñas o en menor profusión que la radiografía estándar de la categoría 1.

Categoría 1: pequeñas opacidades en número escaso (los vasos intrapulmonares normales son visibles).

Categoría 2: abundantes opacidades pequeñas (los vasos intrapulmonares normales son visibles parcialmente).

Categoría 3: pequeñas opacidades muy abundantes (los vasos intrapulmonares normales no son visibles).

2.1.2 Campos pulmonares afectados: Se refiere a las zonas del pulmón donde se identifican las opacidades. Cada pulmón se divide en 3 campos: superior, medio e inferior.

2.1.3 Forma y tamaño: para clasificar la forma y tamaño se debe comparar con las radiografías estándar de la ILO. Las pequeñas opacidades se dividen en redondeadas e irregulares, cada una con tres categorías de tamaño. las opacidades pequeñas y redondeadas se describen como “p” (<1.5mm), “q” (1.5-3mm) y “r” (3-10mm). Las opacidades irregulares se denominan “s” (<1.5mm), “t” (1.5-3mm) y “u” (3-10mm).

2.1 Grandes opacidades: Se definen como opacidades con un diámetro mayor de 10mm. Existen 3 categorías:

2.2.1 Categoría **A**: una opacidad grande con diámetro mayor de 10-50 mm, o varias opacidades en las que la suma de sus diámetros mayores no excede de 50 mm.

2.2.2 Categoría **B**: una opacidad grande con diámetro mayor superior a 50 mm, pero menor que el campo superior derecho, o varias opacidades en las que la suma de sus diámetros mayores es superior a 50 mm, pero menor que el campo superior derecho.

2.2.2 Categoría **C**: una opacidad mayor que el campo superior derecho, o varias opacidades cuya suma sea mayor que el campo superior derecho.

3. Alteraciones pleurales:

3.1 Placas pleurales: engrosamientos pleurales localizados de más de 3 mm de espesor.

3.2 Obliteración del seno costofrénico

3.3 Engrosamiento pleural difuso.

4. Símbolos: describen hallazgos adicionales codificados

5. Comentarios libres, no incluidos en la lectura anterior

A partir de la última revisión de la ILO en el año 2011, se permite la utilización de imágenes digitales en la valoración de silicosis. Se proporcionan 22 imágenes estándar en formato digital y se especifican las características técnicas que deben de cumplir los equipos radiológicos y los requerimientos

para la lectura de las radiografías: las imágenes deben de visualizarse en monitores de pantalla plana de grado médico diseñado para radiología diagnóstica de por lo menos 21 pulgadas (54 cm) por imagen, con una razón de luminosidad máxima de por lo menos 250 candelas/m<sup>2</sup>. El lanzamiento del píxel no debe de ser mayor a 210 micras, y con una resolución de por lo menos 2,5 pares lineales por milímetro.

### **3.- Exclusión de otras patologías**

Los hallazgos radiológicos de la silicosis pueden ser similares a los de la tuberculosis miliar, linfangitis carcinomatosa, microlitiasis alveolar, sarcoidosis, fibrosis pulmonar idiopática, hem siderosis y algunas infecciones respiratorias. En casos seleccionados para un adecuado diagnóstico diferencial será preciso ampliar estudios (Figura 4)

## **PRUEBAS COMPLEMENTARIAS**

### **Pruebas de función pulmonar**

Constituyen un apoyo en el diagnóstico y el seguimiento de los pacientes para detectar afectación pulmonar, sustentar el diagnóstico de gravedad de cada caso y orientar el futuro laboral.

La espirometría es la técnica principal para realizar el estudio funcional. Los hallazgos pueden oscilar entre valores normales y patrones tanto obstructivos como no obstructivos con descensos acusados de FEV<sub>1</sub> y FVC. Estudios observacionales con muestras amplias han demostrado como la pérdida de función pulmonar medida con descenso en FVC y FEV<sub>1</sub> guarda relación con la magnitud de la exposición, la extensión de las lesiones radiológicas y los

antecedentes de enfermedad tuberculosa (*grado de evidencia moderado*) **(20,21)**. La espirometría se hará en el momento del diagnóstico y en las consultas de seguimiento de los pacientes para valorar el posible deterioro funcional **(22,23)** (*recomendación consistente*).

La capacidad de difusión se altera en las formas complicadas de la enfermedad y es sensible para detectar la presencia de fibrosis **(14)**. Los volúmenes pulmonares estáticos pueden mostrar un descenso en la capacidad pulmonar total que guarda relación con la afectación radiológica. Estas exploraciones se realizarán a los pacientes con formas complicadas o donde se detecten anomalías en la espirometría simple (*recomendación consistente*).

La pulsioximetría y la gasometría arterial son útiles para establecer la gravedad ya que pueden detectar la existencia de insuficiencia respiratoria ( $\text{paO}_2 < 60 \text{ mmHg}$  con  $\text{SpO}_2 < 90\%$ ) en los casos mas avanzados.

Los estudios realizados en el ejercicio no parecen aportar datos relevantes en los pacientes asintomáticos, pero pueden ser útiles en casos seleccionados para medir de forma objetiva la capacidad de ejercicio **(14)** (*nivel de evidencia baja, recomendación consistente*).

El estudio de biomarcadores en muestras de vía aérea tomadas con distintas técnicas (fracción espirada de óxido nítrico: FeNO, esputo inducido, condensado de aire exhalado) ha demostrado la presencia de marcadores de inflamación y estrés oxidativo, que aunque de forma no totalmente concluyente parecen estar relacionados con la gravedad radiológica y funcional de la enfermedad **(24,25)**. Estas determinaciones no están incorporadas a la práctica clínica y solo tiene en la actualidad relevancia en el terreno de la investigación.

## Otras exploraciones radiológicas

### .-Tomografía computarizada de alta resolución (TCAR)

Los hallazgos característicos en la TCAR incluyen: nódulos de pequeño tamaño, que se pueden calcificar, con tendencia a situarse en campos superiores y posteriores, con localización centrolobulillar y subpleural, estos últimos al confluir adoptan una morfología en pseudoplaquetas. Las masas de fibrosis masiva progresiva (FMP), suelen tener borde espiculado y se asocian a enfisema bulloso circundante, presentan densidad de partes blandas y pueden tener áreas de calcificación o zonas de menor densidad en su interior por necrosis; también se observa distorsión de la arquitectura pulmonar y de la anatomía vascular. Son visibles adenopatías hiliares y mediastínicas en el 40% de los casos **(26,27)**

Aunque estudios comparativos entre TCAR y radiografía de tórax en el diagnóstico de silicosis han demostrado una mayor sensibilidad de la TCAR, la falta de una estandarización clara de su lectura y la posibilidad de aumentar los falsos positivos en el proceso diagnóstico hace que no sea una exploración recomendable para el despistaje de silicosis **(28-30)** (*nivel de evidencia moderada, recomendación consistente*).

Respecto al papel del TACAR en el diagnóstico de silicosis, cabe añadir que al igual que ocurre con el despistaje de otras enfermedades, su utilización sistemática puede tener más inconvenientes que ventajas. Los criterios diagnósticos de silicosis están basados en una historia laboral y unos hallazgos radiológicos típicos, los datos disponibles sobre ella proceden de estudios de cohortes en los que la herramienta utilizada es la radiografía de tórax.

Generalizar el uso del la TCAR podría llevar a detectar nódulos de significado incierto que no permitirían establecer un diagnóstico de certeza y podrían añadir confusión. Además desde el punto de vista laboral y de acuerdo con la normativa actual el trabajador podría no ser subsidiario de incapacidad y sin embargo la empresa podría declararle no apto para su trabajo. Teniendo en cuenta todos estos aspectos, y en función del conocimiento disponible creemos que la indicación del la TCAR estaría limitada a los casos siguientes.

1.- Radiografía de tórax con opacidades nodulares muy profusas y con tendencia a la coalescencia, ya que en esta situación se podrían detectar masas de fibrosis en fases iniciales.

2.-Hallazgos radiológicos atípicos para el diagnostico diferencial con otras entidades.

### **.-Resonancia Nuclear Magnetica y Tomografia por emision de positrones**

La resonancia magnética (RM) puede ser útil en aquellas formas atípicas con masas asimétricas o unilaterales, que plantean el diagnóstico diferencial con carcinoma de pulmón. Las masas de FMP son isointensas en secuencias T1, y discretamente hipointensas en secuencias T2, mientras que la neoplasia es hiperintensa en secuencias ponderadas en T2 **(31)** . No está claramente establecido el papel de la tomografía por emisión de positrones (PET) con F-18 fluordeoxiglucosa (FDG) en la evaluación de las masas de FMP, y están descritas intensas captaciones de FDG en masas de fibrosis y en las adenopatías simulando una neoplasia o adenopatías metastásicas **(32)**.



## Anatomía patológica

En la mayoría de los casos, la historia laboral y los estudios de imagen del tórax reúnen datos suficientes para emitir un diagnóstico de silicosis de alta probabilidad, sin necesidad de recurrir a la biopsia pulmonar por lo que el estudio del tejido pulmonar quedaría para casos de presentación atípica y difícil diagnóstico diferencial.

La presencia de polvo en el pulmón y la reacción fibrosa consecuente se producen por un fracaso en los mecanismos de aclaramiento pulmonar. Las adenopatías mediastínicas e hiliares que con frecuencia preceden y/o acompañan a la silicosis son un reflejo del mecanismo de aclaramiento linfático. En ausencia de reacción fibrosa intersticial las adenopatías no son diagnósticas de silicosis.

Se reconocen diferentes reacciones patológicas a la inhalación de sílice: silicosis nodular simple, silicosis complicada con fibrosis masiva progresiva, silicoproteínosis, granulomatosis y fibrosis intersticial difusa **(33)**.

**Silicosis Nodular:** Es la lesión característica de la silicosis simple. Un nódulo hialino formado por haces de tejido colágeno de disposición concéntrica en *capas de cebolla*, rodeado de un halo de macrófagos y escasos linfocitos. Los nódulos se encuentran en torno al bronquiolo respiratorio, en las paredes alveolares y perivasculares. Se localizan preferente en lóbulos superiores al inicio del proceso, y difusamente al progresar la enfermedad.

**Silicosis Complicada:** presenta FMP definida como nódulos mayores de 1 centímetro, como resultado de la conglomeración de los nódulos previamente formados. Se localizan con mayor frecuencia en lóbulos superiores y regiones subpleurales. La coalescencia de los nódulos se acompaña de retracción del

parénquima circundante y enfisema cicatricial.

**Silicoproteínosis:** material proteináceo con tinción PAS positiva relleno de los espacios alveolares de forma similar a la proteinosis alveolar.

**Fibrosis intersticial** estudios en autopsias y muestras quirúrgicas detectan un patrón de fibrosis intersticial similar a la NIU en pacientes con exposición a sílice **(34)**, que en ocasiones acompañado de nódulos típicos.

**Granulomas:** la mayor utilización de estudios anatomopatológicos ha permitido observar la presencia de granulomas que acompañan a los depósitos de sílice y que ha dado lugar a especulaciones sobre una entidad similar a la sarcoidosis, por inhalación de sílice **(35)**

## **OTRAS ENFERMEDADES RELACIONADAS CON LA INHALACION DE SILICE CRISTALINA**

En sujetos sometidos a inhalación de sílice cristalina, y como consecuencia de ello, pueden aparecer otras enfermedades

### **1.-EPOC**

Estudios poblacionales han identificado que el trabajo en algunas industrias supone un incremento de probabilidad de padecer EPOC, con un riesgo atribuible del 19% .

Una revisión sistemática que incluye 13 estudios en 4 cohortes de trabajadores de minas de carbón y minas de oro encontró relación entre la pérdida de función pulmonar y la exposición a polvo respirable, apareciendo síntomas y descenso en el FEV1 incluso entre no fumadores **(36,37)** (*calidad de evidencia moderada*) , también se sugiere que la exposición a sílice cristalina podría tener relación con la aparición de limitación al flujo aéreo

especialmente en concentraciones de entre 0,1 y 0,2 mg/m<sup>3</sup> , ( **38**) (*calidad de evidencia baja*). El exceso de riesgo del efecto de combinar exposición a sílice y a tabaco excede claramente la suma de los riesgos, sugiriendo un efecto sinérgico de ambos factores (**39**) (*calidad de evidencia moderada*).

## **2.- Enfermedad por micobacterias**

El riesgo de tuberculosis es 2,8 a 39 veces mayor en pacientes con silicosis respecto a controles sanos (**40**) además la silicosis figura entre las condiciones clínicas que favorecen la reactivación de la enfermedad con un RR de 30 (**41**), y en estudios longitudinales se ha demostrado un mayor riesgo de tuberculosis en expuestos a sílice(3 a 6 veces comparado con la población general). (*calidad de evidencia moderada*).

Además la silicosis es factor de riesgo para enfermedad pulmonar por micobacterias no tuberculosas (MNT) (**42,43**) (*calidad de evidencia baja*).

## **3.- Otras infecciones**

La silicosis es factor de riesgo para formas de aspergilosis pulmonar crónica: aspergiloma o aspergilosis pulmonar necrotizante crónica (APNC). (**44,45**).

La nocardiosis pulmonar es una entidad poco frecuente que incide en pacientes inmunodeprimidos y que también se ha descrito asociada a silicosis en relación con el efecto tóxico de la sílice sobre la funcionalidad de los macrófagos pulmonares (**46**).

## **4.- Cáncer de pulmón**

La sílice cristalina inhalada en la forma de cuarzo o cristobalita, está considerada carcinógena (Grupo 1) para humanos desde 1997 por la International Agency for Research on Cancer (IARC) (**47**). Estudios de biología molecular han demostrado que la inhalación de sílice es capaz de inducir daño

cromosómico de forma directa o indirecta a través de mecanismos celulares de activación macrofágica e inflamación persistente **(48)**.

A pesar de la heterogeneidad en los estudios publicados, la mayoría de ellos sostienen la asociación entre la exposición a sílice y cáncer de pulmón con independencia del tabaquismo y un aumento significativo del riesgo de cáncer de pulmón en pacientes con silicosis y en expuestos a SiO<sub>2</sub> **(49)** con RR:1,74-2,76 para silicosis y 1,25-1.32 para trabajadores expuestos.

## **5.-Enfermedades del colágeno**

La inhalación de sílice cristalina produce a nivel sistémico alteraciones del sistema inmunológico con aparición de patología autoinmune **(50)**. La Artritis Reumatoide y la Esclerodermia son las collagenopatías más frecuentemente asociadas a silicosis (4,2% y 0,3% respectivamente), con tasas de prevalencia significativamente superiores a la población general **(51)**. También están descritas mayores tasas de exposición a sílice en pacientes con Lupus eritematoso sistémico **(52)**.

## **6.-Sarcoidosis**

Existe un riesgo elevado de sarcoidosis entre las personas expuestas a sílice y también de coexistencia de ambas patologías (silicosarcoidosis) **(53)**. Es recomendable el examen histológico exhaustivo en búsqueda de lesiones de silicosis en pacientes con exposición a sílice y diagnóstico de sarcoidosis pulmonar, para evitar que una enfermedad profesional como es la silicosis pueda pasar inadvertida **(35)**. *(calidad de evidencia baja)*.

## **7.- Nefropatía**

Los trabajadores expuestos a sílice cristalina incluso en ausencia de silicosis tienen incrementado el riesgo de enfermedad renal aguda y crónica, particularmente enfermedad glomerular **(54)** (*calidad de evidencia baja*).

## COMPLICACIONES

### 1.-Cavitacion de masas de FMP

En las formas complicadas, las masas de FMP pueden cavitarse por necrosis isquémica, artritis reumatoide (síndrome de Caplan), infecciones (anaerobios, micobacterias, hongos) o cáncer de pulmón, por lo que ante la cavitación de una masa de fibrosis habrá que tener en cuenta estos procesos en el diagnóstico diferencial y poner en marcha las pruebas necesarias para su despistaje.

### 2.-Melanoptisis

Consiste en la emisión de un esputo de color negro constituido por polvo de sílice, junto con cristales de colesterol, fibras de colágeno, secreciones bronquiales y ocasionalmente sangre. Puede aparecer tanto en la neumoconiosis simple como en la complicada, pero es más frecuente y grave cuando se cavitan los conglomerados en la FMP hacia la vía aérea. Las pruebas de imagen pueden mostrar el vaciado de la masa de FMP y/o la aparición de un nivel hidroaéreo en el interior de la masa. **(55)**. La fibrobroncoscopia permite confirmar el diagnóstico con la visualización de la vía aérea

### 3.-Hemoptisis

La hemoptisis puede presentarse en cualquier momento en el curso de la enfermedad y guarda relación con la presencia de bronquiectasias o masas de FMP, es más frecuente su aparición en las formas complicadas. Es necesario excluir la presencia de entidades como: tuberculosis, cáncer de pulmón, o micosis. Su manejo no difiere sustancialmente del propuesto para otros procesos **(56)**

#### **4.-Compresión local.**

Las hipertrofias ganglionares pueden causar compresiones locales y aparición de disfagia o parálisis diafragmática por afectación del nervio frénico, también es mas frecuente la presencia de un “síndrome del lóbulo medio”.

#### **5.-Neumotórax**

Hay una elevada incidencia de neumotórax secundario en pacientes con formas complicadas, con una curso clínico más tórpido y mayor dificultad para la reexpansión del pulmón **(57)**.

### **MANEJO TERAPEUTICO Y PREVENCION**

La silicosis es una enfermedad crónica, incurable y progresiva. Dependiendo de su gravedad puede provocar morbilidad, discapacidad y muerte. En la actualidad aún no disponemos de tratamiento efectivo para revertir las lesiones ni frenar su progresión, por ello los esfuerzos se centran en los tres niveles de prevención.

#### **1.-Prevención primaria**

Consiste en mantener los niveles de polvo respirable dentro de los límites que marca la legislación . Este aspecto estrictamente técnico se escapa del

alcance del médico, no obstante, los límites de sílice respirable actualmente admitidos no eliminan completamente el riesgo de enfermedad.

## **2.-Prevención secundaria**

Dirigida a diagnosticar la enfermedad en los estadios iniciales y prevenir complicaciones. Los trabajadores expuestos a inhalación de sílice deben de ser incluidos en un programa de vigilancia de la salud, que incluye historia clínica, espirometría y radiografía de tórax, con una periodicidad establecida en función de los años de exposición acumulada según protocolo aprobado en orden ITC 2585/2007 para la protección de los trabajadores contra el polvo en relación con la silicosis. Cuando se diagnostiquen casos de neumoconiosis complicada se realizarán además estudios de difusión y volúmenes pulmonares estáticos. Los controles periódicos se realizarán cada 1-3 años en función de la forma clínica, la afectación funcional y radiológica espaciándolos en los casos mas leves (fig 5). Habría que incentivar también la búsqueda de casos adicionales en las industrias donde se realicen diagnósticos.

El papel carcinógeno de la sílice y la probable sinergia con el tabaco en el desarrollo de la EPOC en sujetos expuestos hace que la deshabituación tabáquica sea un objetivo especialmente importante en este colectivo (*nivel de recomendación consistente*). Los pacientes con silicosis serían susceptibles de ser vacunados contra el *Streptococcus pneumoniae* y anualmente contra la gripe como portadores de enfermedad respiratoria crónica. (*calidad de evidencia alta , recomendación consistente*).

## **3.-Prevención terciaria**

Una vez efectuado un diagnóstico de silicosis hay que evitar la exposición a inhalación de sílice para frenar la progresión de la enfermedad **(58)** (*Calidad*

*de evidencia moderada, recomendación consistente*). Hay que realizar despistaje y tratamiento de la infección y enfermedad tuberculosa según pautas habituales **(41)**.

El defecto ventilatorio obstructivo es una circunstancia muy frecuente en los casos de silicosis complicada. El tratamiento incluyendo las formas en que se acompaña de insuficiencia respiratoria es similar al recomendado para el paciente con EPOC **(58)**.

El trasplante puede ser la única alternativa en los casos graves de personas jóvenes. Aunque no hay indicaciones específicas para esta opción en los pacientes con silicosis, los estudios disponibles muestran una supervivencia similar a la de pacientes con EPOC u otras enfermedades intersticiales difusas **(59)**

## **EL NEUMOLOGO EN LA VALORACION DE INCAPACIDAD LABORAL**

### **1.-Reubicación laboral**

Ante el diagnóstico de silicosis la primera prescripción médica es el cese de la exposición. Si se trata de un trabajador en activo, esta indicación se deberá comunicar al servicio médico de prevención de riesgos laborales, para que sea reubicado en un puesto de trabajo sin riesgo de exposición. Si no existiera tal puesto debería ser considerado incapacitado para continuar en la actividad

### **2.-Declaración de enfermedad profesional**

Al tratarse de una enfermedad profesional, recogida en el grupo IV del anexo I del RD 1299/2006 de 10 de noviembre de Enfermedades Profesionales, debe ser declarada oficialmente en el registro *ad hoc* disponible en las direcciones provinciales del INSS (CEPROSS). Esta declaración habitualmente la realiza



la Mutua de ATEEPP, como entidad colaboradora de la Seguridad Social responsable de la protección y aseguramiento de las contingencias profesionales. En el caso de que el paciente no tuviera esta cobertura (por estar en situación de desempleo o jubilado), es la inspección médica de la dirección provincial del INSS, el órgano competente para hacer este trámite. La comunicación del diagnóstico a estas entidades corresponde al médico de Atención Primaria tras el diagnóstico realizado por el neumólogo.

### **3.-Valoración de incapacidad**

La valoración del grado de incapacidad laboral permanente, a la que puede dar lugar, es competencia de la Dirección Provincial del I.N.S.S, pudiendo ser solicitada a instancia del interesado, ante el Equipo de Valoración de Incapacidades correspondiente a dicha Dirección Provincial, que basándose en los informes médicos proporcionados y aplicando la normativa legal vigente, determinará el grado de incapacidad que proceda.

Esta valoración únicamente se plantea cuando existe un diagnóstico de silicosis de seguridad, que según la normativa legal exige una Rx de tórax con profusiones  $\geq 1/1$ , de la clasificación de la ILO.

La información que a estos efectos debe contener el informe del neumólogo será:

1.- la forma clínica de la enfermedad (silicosis simple, complicada, especificando la categoría, según la clasificación ILO, o fibrosis intersticial difusa)

2.-Cualquier alteración funcional respiratoria de carácter permanente, independientemente de que sea derivada de otra enfermedad diferente de la silicosis, en cuyo caso, habrá que señalar la patología de que se trate.

3.-Se ha de reseñar la posible concurrencia de una silicosis con una tuberculosis pulmonar activa o residual, ya que la normativa establece para cada una de estas situaciones un grado de una incapacidad laboral diferente. Los estudios neumológicos básicos requeridos son: radiografía de tórax en proyección PA y L (que debe ser interpretada conforme a la clasificación ILO) y una espirometría. El resto de exploraciones complementarias se aportarán según las circunstancias concretas de cada paciente.

## **REPERCUSIÓN SOCIAL.**

Además de las consideraciones médicas señaladas, el diagnóstico de la enfermedad tiene un gran impacto sobre la vida socio-laboral del paciente, pues a diferencia de otras enfermedades e independientemente de la afectación funcional que origine, da lugar a una pérdida de aptitud para continuar en trabajos con riesgo de exposición a sílice. Por tanto, el diagnóstico debe estar sólidamente sustentado y no debe de formularse ante meras sospechas o mínimas alteraciones.

Por otra parte, los trabajadores sanos son incluidos en un programa de vigilancia que durará toda su vida laboral, por lo que los responsables del mismo deben hacer un uso racional de la radiología - herramienta diagnóstica esencial- teniendo en cuenta los riesgos y relación coste-beneficio de todas sus modalidades. La utilización del TCAR a estos efectos se hará de acuerdo con las indicaciones señaladas en esta guía.

Las mismas consideraciones cabe hacer respecto de los trabajadores sanos o enfermos, ya retirados, en relación al seguimiento médico periódico, realizado por el servicio público de salud.

Consecuentemente se han de perseguir diagnósticos de alta probabilidad, lo cual exige que toda sospecha diagnóstica de enfermedad sea estudiada en el ámbito de la neumología, preferiblemente en unidades o grupos con experiencia acreditada y medios técnicos suficientes que permita el despistaje de otras enfermedades y la obtención de diagnósticos de certeza.

## **BIBLIOGRAFIA**

1.- Kogevinas. Sistema de información sobre exposición ocupacional a cancerígenos en España en el 2004 CAREX-ESP. instituto Municipal de Investigación Médica (Barcelona) 2006.

<http://www.istas.net/web/abreenlace.asp?idenlace>

2.- Ubeda Martínez E, Sibon Galindo JM, Valle Martín M, Muñoz Mateos F. The epidemiology of silicosis in The El Escorial region. Rev Clin Esp, 1990 oct; 187 (6):275-9),

3- A. Quero, G Rego, C. B. de Qurós, C. Martínez, A. González Fernández, J.L. Eguidazu. Prevalencia de problemas respiratorios en un colectivo con exposición mixta. Arch Bronconeumol , 1994. Vol 30 Supl nº 1, pp:62-63

4.- C. Martínez, A. Quero, C. Bernaldo de Quirós, I.G. Obrero, A. Díaz. Datos preliminares del estudio epidemiológico en la industria del granito en la comunidad autónoma de Extremadura. Arch de Bronconeumol 1993, Vol 29 Supl 1, pp:53)

5.- Mateos L, Martínez C, Quero A, Isidro I, Cuervo V, Rego G. Estudio de salud respiratoria en trabajadores expuestos a inhalación de sílice en Extremadura. Arch Bronconeumol 2005; 41:18

6.- Memorias y estadísticas de los nuevos casos de Silicosis registrados en el INS (2008-2013) <http://www.ins.es>

7 :-Martinez C, Prieto A, García L, Quero A, Gonzalez S, Casan P. Silicosis: una enfermedad con presente activo. Arch Bronconeumol. 2010 Feb; 46(2):97-100.

8 .-Bridge I. Crystalline Silica: A review of the dose response relationship and environmental risk. Air Quaity and Climate Change 2009; 43:17-23

9.- Instituto Nacional de seguridad e Higiene en el Trabajo. Límite de exposición profesional para agentes químicos en España. 2013.  
<http://www.insht.es>

10.- ORDEN ITC/2585/2007, de 30 de agosto, por lo que se aprueba la instrucción técnica complementaria 2.0.02 << Protección de los trabajadores contra el polvo, en relación con la silicosis en las industrias extractivas >> del Reglamento General de Norma Básicas de Seguridad minera. BOE nº 215 (7-9-2007)

11.-Greaves IA. Not so simple silicosis: a case for public health action. Am J Ind Med 2000; 37: 245-251).

12.- Chen W, Hnizdo E, Chen JQ, Attfield MD, Gao P, Hearl F, et al. Risk of silicosis in cohorts of Chinese tin and tungsten miners and pottery workers: an epidemiological study. Am J Ind Med 2005; 48(1): 1-9

13.- Katsnelson BA, Polzik EV, Privalova LI. Some aspects of the problem of individual predisposition to silicosis. Environ Health Perspect 1986; 68: 175-185

14.- Leung CC, Sun Yu IT, Chen W. Silicosis. Lancet 2012;379:2008-2018.

15.- Arakwa H, Johkoh T, Homma K, Saito Y, Fukushima Y, Shida H et al. Chronic Interstitial Pneumonia in silicosis and mix-dust pneumoconiosis.its prevalence and comparison of CT findings with idiopathic pulmonary fibrosis. Chest 2007;131:1870-76.

16.-National Institute for Occupational Safety and Health. Health effects of occupational exposure to respirable crystalline silica.

Cincinnati,OH:Department of Health and Human Services, 2002.

17.-Greenberg MI, Waksman J, Curtis J. Silicosis: a review. Dis Mon 2007;53:394-416.

18.- Burge P. How to take an occupational history relevant to lung disease. In: Hendrick D, Burge P, BeckettW, Churg A, editors. Occupational disorders of the lung. Philadelphia: WB Saunders; 2002. p. 25–32.

19.- Guidelines for the use of the ILO International Classification of Radiographs of Pneumoconioses. Occupational safety and health series No 22. Rev 2011. Geneva International Labour Office.

20.--Ehrlich RI, Myers JE, Water Naude JM, Thompson ML, Churchyard GJ, Lung function loss in relationn to silica dust exposure in South African gold miners. Occup Environ Med 2011;68:96-101

21.-Hochgatterer K, Moshammer H, Haluza D. Dust Is in the air: effects of occupational exposure to mineral dust on lung function in a 9-year study. Lung 2013;191:257-263

22.- Mirabelli M, Stephanie J London, Luenda E Charles, Lisa A Pompeli, and Lynne E Wagenknecht. Occupation and three-year incidence of respiratory symptoms and lung function decline: the ARIC study. *Respiratory Research* 2012;13:24

23.- Karl Hochgaterer, Hanns Moshhammer and Daniela Haluza. Dust is in the air: effects of occupational exposure to mineral dust on lung function in a 9-year study. *Lung* 2013;191:257-263.

24.- Sauni R, Oksa P, Lehtimäki L, Toivio P, Palmroos P, Nieminen R, et al. *Occup Environ Med* 2012; 69: 256-260.

25.-Pelclova D, Fenclova Z, Kacer P, Navratil T, Kuzma M, Levedoba J et al . 8-isoprostane and leukotrienes in exhaled breath condensate in Czech subjects with silicosis. *Industrial Health* 2007;45:766-774.

26.-Suganuma N, Kusaka Y, Hering KG, Vehmas T, Kraus T, Parker JE et al. International CT Classification Study Group. Selection of reference films based on reliability assessment of a classification of high-resolution computed tomography for pneumoconioses. *Int Arch Occup Environ Health*. 2006;79:472-476.

27.-Silicosis pulmonar: hallazgos radiológicos en la tomografía Computarizada.

González M., Trinidad C., Castellón D., Calatayud J. y Tardáguila F.

Radiología. 2013; 55: 523-32

28.- Ooi CG. Silicosis and coal workers' pneumoconiosis. En: Müller NL, Silva

CI, editores. Imaging of the chest. 1st ed. Philadelphia: Saunders/Elsevier;

2008. p. 1117-36.

29.-Hering KG, Tuengerthal S, Kraus T. Standardized CT/HRCT classification

of the German Federal Republic for work and environmental related thoracic

diseases. Radiologe.2004;44: 500-11.

30.-Aziz ZA, Hansell DM. Occupational and environmental lung disease: the

role of imaging In: Gevenois, PA & De Vuyst P, eds Imaging of Cocupationaal

and Enviromental Disorders of the Chest. Berlin. Springer, 2006.

31.- Matsumoto S, Mori H, Miyake H, Yamada Y, Ueda S, Oga M et al. MRI

signal characteristics of progressive massive fibrosis in silicosis. Clin Radiol.

1998;53:510-514.

32.- Chung SY, Lee JH, Kim TH, Kim SJ, Kim HJ, Ryu YH. 18F-FDG PET

imaging of progressive massive fibrosis. Ann Nucl Med. 2010;24:21-27.



- 33.- Gibbs AR, Wagner JC. Diseases due to silica In: Pathology of occupational lung disease. Ed by A Churo FHY Grenn. Igaku-Shoin New Cork-Tokyo 1998 .
- 34.- Arakawa H, Johkoh T, Honma K, Saito Y, Fukushima Y, Shida H, Suganuma N. Chronic interstitial pneumonia in silicosis and mix-dust pneumoconiosis: its prevalence and comparison of CT findings with idiopathic pulmonary fibrosis. *Chest*. 2007;131:1870-6
- 35.- Quero A, Urrutia C, Martínez C, Rego G. Silicosis and sarcoid pulmonary granulomas, silicosarcoidosis?. *Med Clin (Barc)*. 2002;118:79.
- 36.- Hnizdo E, Sullivan PA, Bang KM, Wagner G. Association between chronic obstructive pulmonary disease and employment by industry and occupation in the Third National Health and Nutrition Examination Survey. *Am J Epidemiol*. 2002;156 (8):738-46.
- 37.- Oxman AD, Muir DC, Shannon HS, Stock SR, Hnizdo E, Lange HJ. Occupational dust exposure and chronic obstructive pulmonary disease. A systematic overview of the evidence. *Am Rev Respir Dis*. 1993;148:38-48.
- 38.- Rushton L. Chronic obstructive pulmonary disease and occupational exposure to silica. *Rev Environ Health*. 2007;22(4):255-72.

- 39.-Rego G, Pichel A, Quero A, Dubois A, Martinez C, Isidro I, Gil M, Cuervo V, Gonzalez A. High Prevalence and Advanced Silicosis in Active Granite Workers: A Dose-Response Analysis Including FEV1. *J Occup Environ Med.* 2008; 50(7):827-833.
- 40.- Waternau JM, Ehrlich RI, Churchyard GJ, Pemba L, Dekker K, Vermeis M, et al. Tuberculosis and silica exposure in South African gold miners. *Occupational and Environmental Medicine.* 2006;63(3):187–192.
- 41.-Ruiz-Manzano J, Blanquer R, Calpe JL, Caminero JA, Caylá J, Dominguez JA, et al. Normativa SEPAR sobre diagnóstico y tratamiento de la tuberculosis. *Arch Bronconeumol.* 2008;44: 551-66.
- 42.- Andréjak C, Nielsen R, Thomsen V, uhaut P, Sorensen HT, Thomsen RW. Chronic respiratory disease, inhaled corticosteroids and risk of non-tuberculous mycobacteriosis. *Thorax.* 2013;68:256-262.
- 43.- Corbet EL, Churchyard GJ, Clayton T, Herselman P, Williams B, Hayes R, Mulder D, De Cock KM. Risk factors for pulmonary mycobacterial disease in south African gold miners. A case-control study. *Am J Respir Crit Care Med.* 1999;159:94-99
- 44.- Blanco JJ, Gonzalez Barcala FJ, Alvarez Moure MA, González Mao MC, Temes E, Guerra JL. Aspergilosis necrotizante crónica como complicación de silicosis. *An Sist Sanit Navar* 2011; 34(1): 109-114

45.- Iossifova Y, Bailey R, Wood J, Kreiss K. Concurrent silicosis and pulmonary mycosis at death. *Emerg Infect Dis* 2010; 16: 318-320

46.- Ziskind M, Jones RN, Weill H. Silicosis. *Am Rev respire Dis* 1976; 113: 643-665

47.- Straif K, Benbrahim-Tallaa L, Baan R, Grosse Y, Secretan B, El Ghissassi F, et al. WHO International Agency for research on cancer Monograph Working Group. A review of human carcinogens-part C: metal, arsenic, dusts, and fibres. *Lancet Oncol.* 2009;10: 453-4.

48.-Born PJ, Tran L, Donaldson K. The carcinogenic action of crystalline silica: a review of evidence supporting secondary inflammation-driven genotoxicity as a principal mechanism. *Crit Rev Toxicol.* 2011;9:756-70

49.-Guha N, Strif K, Benbrahim-Tallaa L. The IARC Monographs on the carcinogenicity of crystalline silica. *Med Lav* 2011;102:310-320.

50.- Maeda M, Nishimura Y, Kumagai N, Hayashi H, Hatayama T, Katoh M, Miyahara N, Yamamoto S, Hirastuka J, Otsuki T. Dysregulation of the immune system caused by silica and asbestos. *J Immunotoxicol.* 2010 Oct-Dec;7(4):268-78

51.- Makol A, Reilly MJ, Rosenman KD. Prevalence of connective tissue disease in silicosis (1985-2006). A report from the state of Michigan surveillance system for silicosis. *Am J Ind Med.* 2011;54:255-262.

52.- Parks CG, Cooper GS, Nylander-French LA, Sanderson WT, Dement JM, Cohen PL, et al. Occupational exposure to crystalline silica and risk of systemic lupus erythematosus: a population-based, case-control study in the southeastern United States. *Arthritis Rheum.* 2002; 46:1840–1850.

53.- Rafnsson V, Ingimarsson O, Hjalmarsson I, et al. Association between exposure to crystalline silica and risk of sarcoidosis. *Occup Environ Med.* 1998; 55:657–60.

54.- Steenland K. One agent, many diseases: exposure-response data and comparative risks of different outcomes following silica exposure. *Am J Ind Med.* 2005; 48:16-23.

55.- Haro M, Nuñez A, Gonzalez G, Vizcaya M. Black sputum and progressive cavitary lung lesion in a coal miner. *CHEST* 1997; 111: 808-809

56.- Roig Cutillas J, Llorente Fernández JL, Ortega Morales FJ, Orriols Martínez R y Segarra Medrano A. Normativa sobre el manejo de la hemoptisis amenazante. *Arch Bronconeumol* 1997; 33: 31-40.

57.- Rivas de Andrés JJ, Jiménez López MF, Molins López-Rodó L, Pérez Trullén A y Torres Lanza J. Normativa sobre el diagnóstico y tratamiento del neumotórax espontáneo. Arch. Bronconeumol 2008; 44(8): 437-448

58: Vestbo J, Hurd S, Agusti A, Jones P, Vogelmeier C, Anzueto A, et al. Global strategy form the diagnosis, management adn prevention of chronic obstructive pulmonary disease. Am J Resp Crit Care Med 2013; 187: 347-365

59.- Singer JP, Chen H, Phelan T, Kukreja J, Goleen JA and Blanc P. Survival following lung transplantation for silicosis and other occupational lung diseases. Occupational Medicine 2012;62:134-137
